# Supplementary material for: Orthogonal photochemistry-assisted printing of 3D tough and stretchable conductive hydrogels
Source: PubMed Central journal article supplement (PMC8027177; doi:10.1038/s41467-021-21869-y), 2021-04-07
Supplement: 41467_2021_21869_MOESM2_ESM.pdf [file 41467_2021_21869_MOESM2_ESM.pdf]

## **Description of Additional Supplementary Files**

File Name: Supplementary Movie 1

Description: Puncture experiment of TCH.

File Name: Supplementary Movie 2

Description: TCH-based actuator.
